# Supplementary material
Source: publisher site journal article supplement (https://static.cambridge.org/content/id/urn:cambridge.org:id:article:S1368980020000051/resource/name/S1368980020000051supp001.pdf)
Supplement: Supplementary file 1 [file S1368980020000051supp001.pdf]

## Supplementary Figure 1: Health Star Rating front-of-package interpretive labelling system (1)

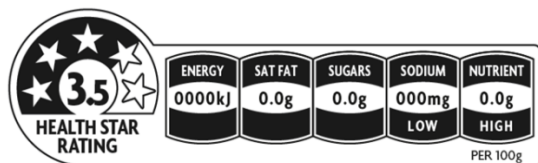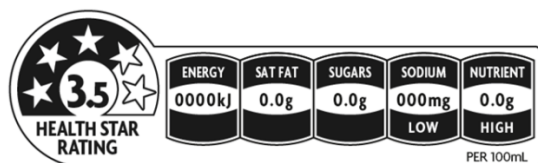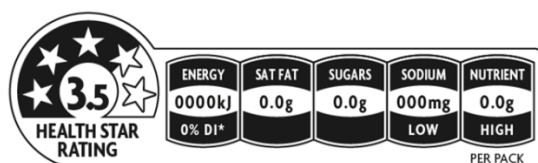

## Reference

1. Department of Health. Health Star Rating: Calculator and artwork Australia: Commonwealth of Australia; 2014 [Available from: <http://www.healthstarrating.gov.au/internet/healthstarrating/publishing.nsf/content/Calculator>].
